# Supplementary material
Source: PubMed Central journal article supplement (PMC2787687)
Supplement: NIHMS150010-supplement-1_si_001.pdf [file NIHMS150010-supplement-1_si_001.pdf]

# Modulating the Gelation Properties of Self-Assembling Peptide Amphiphiles

Joel M. Anderson, Adinarayana Andukuri, Dong Jin Lim, and Ho-Wook Jun

## Supporting Information

**Supplementary Table 1.** Macroscopic gelation properties of peptide amphiphile composite hydrogels modulated at a 3:1 molar ratio

|                                              | PA-RGDS                                                                            | PA-VAPG                                                                            | PA-DGEA                                                                             | PA-YIGSR                                                                             |
|----------------------------------------------|------------------------------------------------------------------------------------|------------------------------------------------------------------------------------|-------------------------------------------------------------------------------------|--------------------------------------------------------------------------------------|
| Molar ratio (PA/PA-S)                        | <i>Moderate gel</i>                                                                | <i>Moderate gel</i>                                                                | <i>Weak gel</i>                                                                     | <i>Viscous solution</i>                                                              |
| 3:1                                          |  |  |  |  |
| <i>Slight changes in hydrogel appearance</i> |                                                                                    |                                                                                    |                                                                                     |                                                                                      |

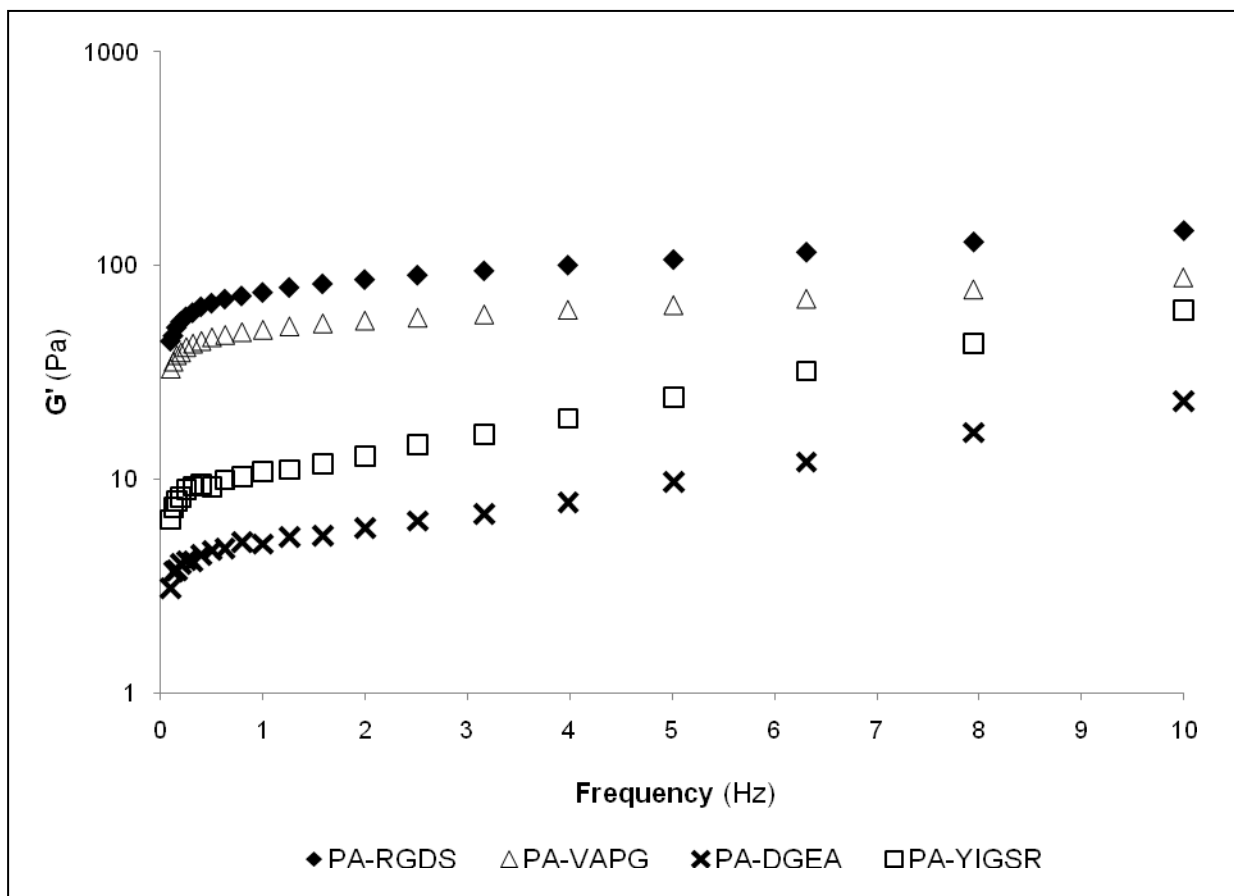

**Supplemental Figure 1.** Viscoelastic characterization using dynamic oscillatory rheometry to measure storage modulus ( $G'$ ) in relation to frequency. Functionalized PAs separately combined with PA-S at a 3:1 molar ratio ( $M_r = PA/PA-S$ ) moderately improved but did not stabilize viscoelasticity.
